# Supplementary material for: Retrospective Cohort Study of the Effectiveness of the Sputnik V and EpiVacCorona Vaccines against the SARS-CoV-2 Delta Variant in Moscow (June–July 2021)
Source: MDPI journal article supplement (doi:10.3390/vaccines10070984), 2022-06-21
Supplement: s1 [file s1]

**Supplemental Table S1.** COVID-19 cases in Moscow categorized according to age and vaccination status of patients (June-July 2021).

| Age   | completed vaccination | month | The outcome and form of COVID-19 infection |      |             |       |                   |      |            |      |              |        | in Moscow               |              |            |
|-------|-----------------------|-------|--------------------------------------------|------|-------------|-------|-------------------|------|------------|------|--------------|--------|-------------------------|--------------|------------|
|       |                       |       | death                                      |      | severe form |       | moderately severe |      | light form |      | asymptomatic |        | vaccin.                 | seronegative | population |
|       |                       |       | unvac.                                     | vac. | unvac.      | vac.  | unvac.            | vac. | unvac.     | vac. | unvac.       | vac.   | by the 1st of the month |              | 2021       |
| 18-50 | Sputnik V             | June  | 158                                        | 1    | 974         | 26    | 10463             | 368  | 88075      | 5703 | 14623        | 1027   | 711347                  |              | 5760116    |
|       |                       | July  |                                            |      | 645         | 13    |                   |      |            |      |              | 879731 | 2947963                 |              |            |
|       | 7                     |       |                                            |      |             | 27529 |                   |      |            |      |              |        |                         |              |            |
| 51-70 | Sputnik V             | June  |                                            |      | 2429        | 103   | 10009             | 833  | 27525      | 4726 | 4202         | 751    | 512338                  |              | 3284276    |
|       |                       | July  |                                            |      | 1819        | 92    |                   |      |            |      |              | 580664 | 1790209                 |              |            |
|       | 24                    |       |                                            |      |             | 17910 |                   |      |            |      |              |        |                         |              |            |
| 71+   | Sputnik V             | June  |                                            |      | 3153        | 174   | 5151              | 606  | 6221       | 1701 | 1398         | 364    | 129466                  |              | 1422425    |
|       |                       | July  |                                            |      | 2418        | 151   |                   |      |            |      |              | 138974 | 831713                  |              |            |
|       | 30                    |       |                                            |      |             | 3206  |                   |      |            |      |              |        |                         |              |            |
| 50+   | Sputnik V             | June  | 1700                                       | 70   | 5582        | 277   | 15160             | 1439 | 33746      | 6427 | 5600         | 1115   | 879731                  |              | 4706701    |
